# Supplementary material for: Effects of Selective Peroxisome Proliferator Activated Receptor Agonists on Corneal Epithelial Wound Healing
Source: MDPI journal article supplement (doi:10.3390/ph14020088), 2021-01-25
Supplement: s1 [file s1]

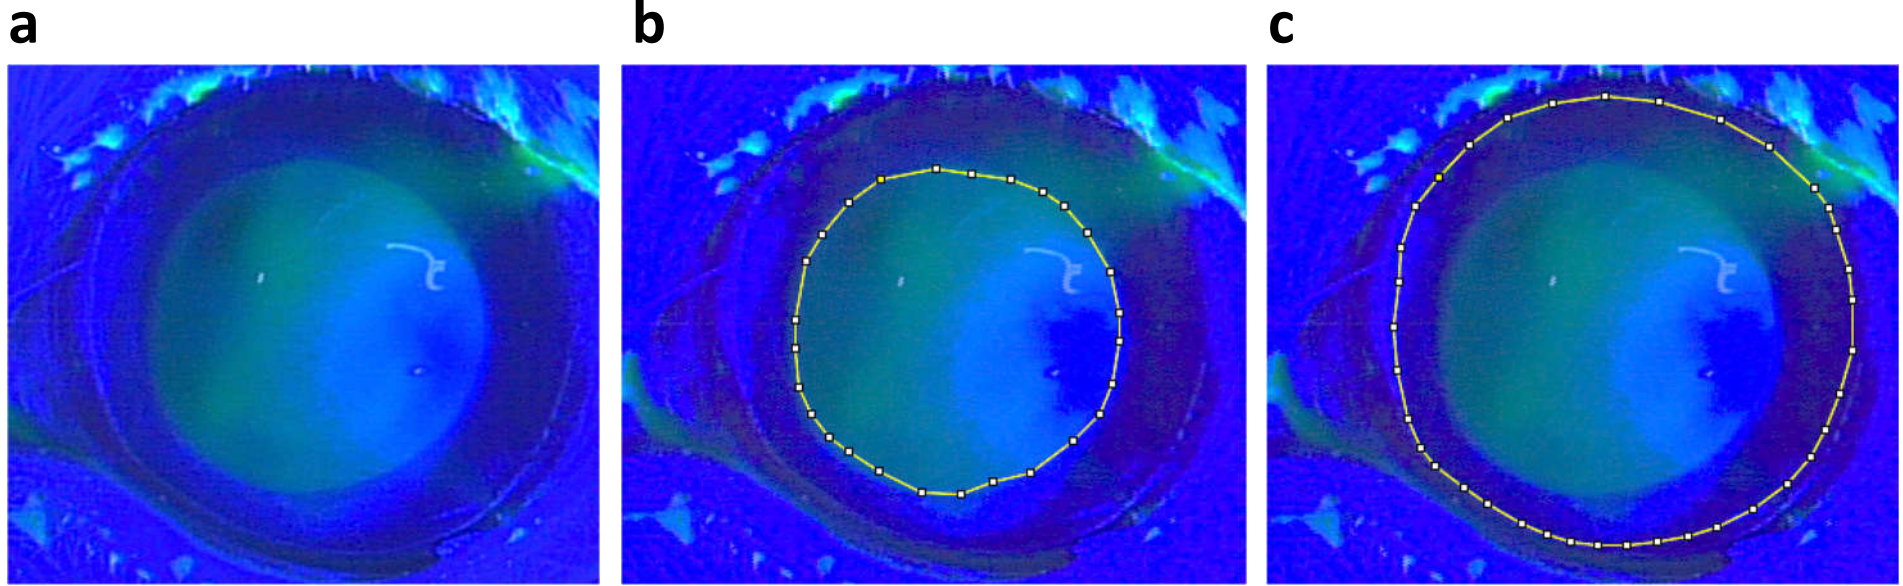

**Figure 1.** (a): Corneal epithelial defects were stained with fluorescein solution and macroscopic photographs were taken under a blue filter. Green areas were considered the corneal epithelium defect area. The area ratio of the green areas (b) to the entire cornea (c) surrounded by the yellow line was calculated using Fiji software.
